# Supplementary material
Source: PubMed Central journal article supplement (PMC7849370)
Supplement: NIHMS1609489-supplement-2.pdf [file NIHMS1609489-supplement-2.pdf]

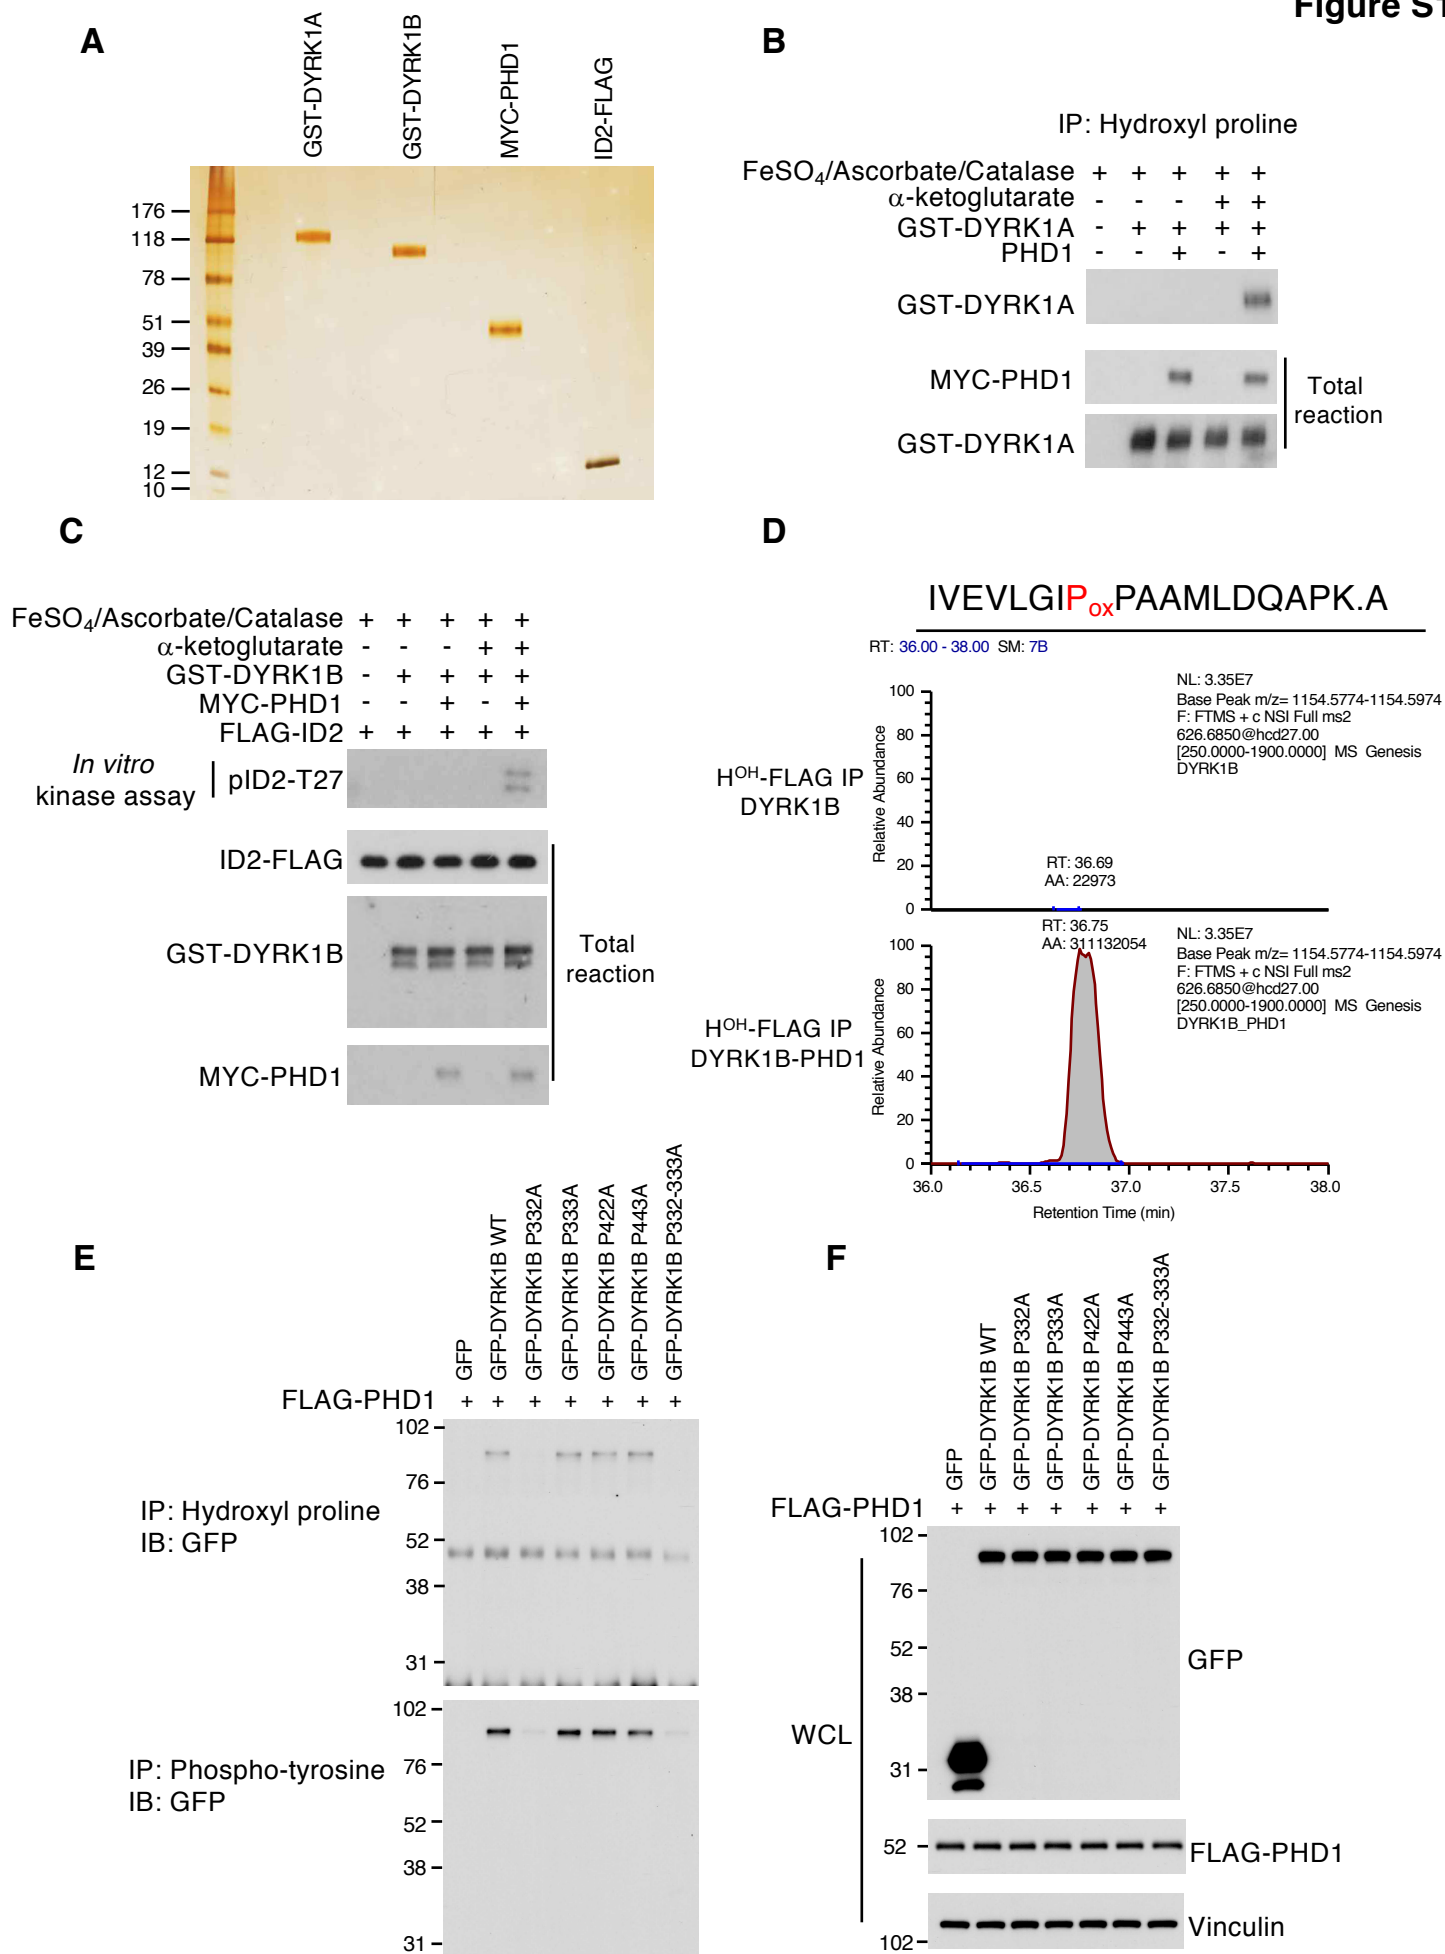

**Figure S1 (Related to Figure 1) DYRK1 kinase proline hydroxylation *in vitro* and mass spectrometry analysis of DYRK1B protein.** (A) Silver staining of 100 ng of recombinant GST-DYRK1A and GST-DYRK1B purified from baculovirus, 100 ng of MYC-PHD1 purified from HEK-293T cells and 150 ng of ID2-FLAG purified from *E. coli*. Purified proteins were used for *in vitro* prolyl hydroxylation and kinase assays. (B) DYRK1A is prolyl hydroxylated *in vitro* by PHD1. Recombinant GST-DYRK1A produced in baculovirus was incubated in the presence or absence of PHD1 and immunoprecipitated using anti-hydroxyl proline antibody. Immunoprecipitated proteins were processed by SDS-PAGE and immunoblot using DYRK1A antibody. Total proteins in the *in vitro* reaction were included as control. (C) Bacterially expressed GST-DYRK1B was incubated in the presence or the absence of PHD1 and used to phosphorylate recombinant ID2-FLAG (*in vitro* kinase assay). Total proteins in the *in vitro* reaction were included as control. (D) Elution profiles of DYRK1B hydroxylated peptide IVEVLGIP#PAAMLDQAPK from cells expressing DYRK1B in the absence (upper panel) or presence (lower panel) of PHD1. The retention time profile of the peptide was generated by tracing a specific fragment, y11 ( $m/z$  1154.5874) of peptide IVEVLGIP#PAAMLDQAPK ( $m/z$  636.685) over time. The area underneath curve was automatically calculated by QualBrowser. Y axis was kept constant. (E) GFP-DYRK1B wild type and proline to alanine point mutants and double mutant P332A-P333A were co-expressed with PHD1 in U87 cells. Cell lysates were analyzed for the presence of proline hydroxylation and tyrosine phosphorylation by immunoprecipitation using anti-hydroxyl proline or anti-phospho-tyrosine antibody followed by western blot for GFP-DYRK1B. (F) Whole cellular lysate (WCL) from the experiment in E.

A

DYRK1A

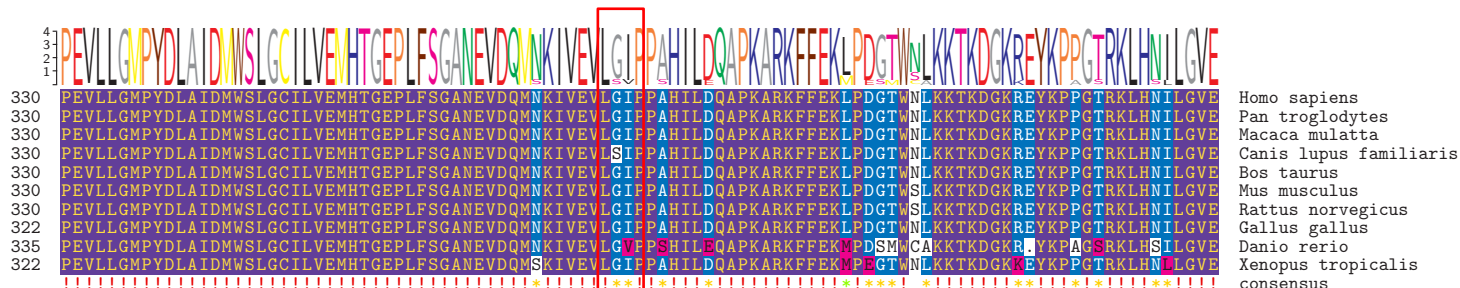

B

DYRK1B

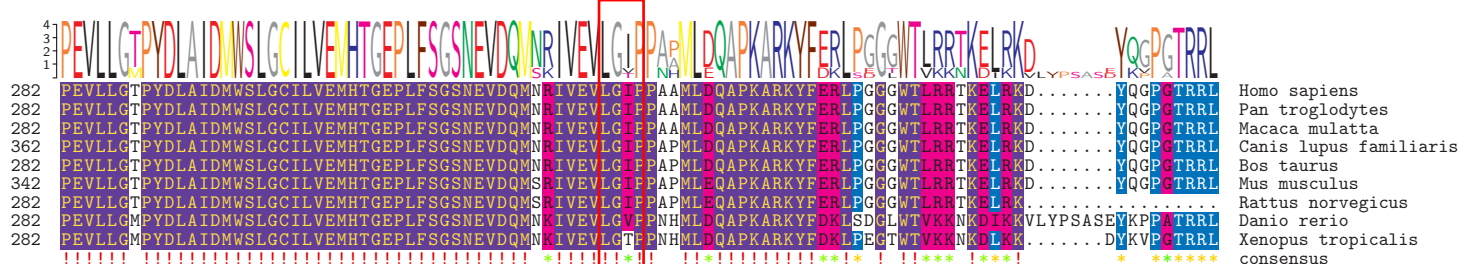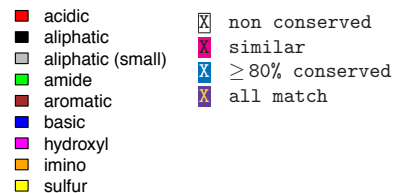

**Figure S2 (Related to Figure 2) Evolutionary conservation of proline 380 in DYRK1A and proline 332 in DYRK1B.** (A) Amino acid sequence flanking P380 of DYRK1A is evolutionarily conserved. (B) Amino acid sequence flanking P332 of DYRK1B is evolutionarily conserved. The prolyl hydroxylation motif is boxed in red.

**A**

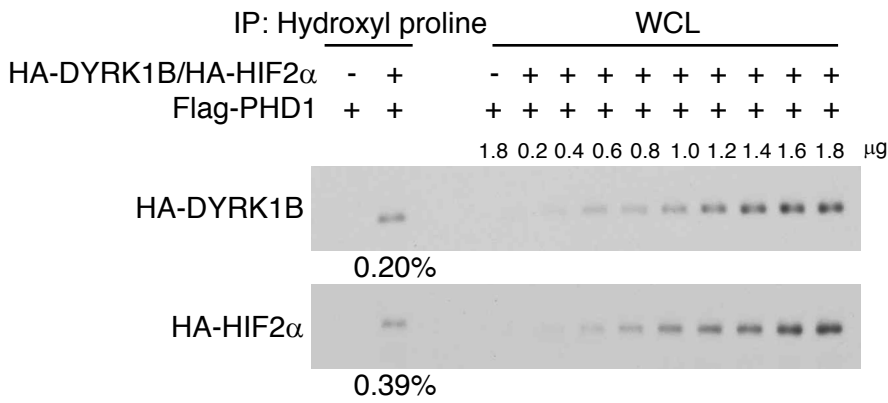

**B**

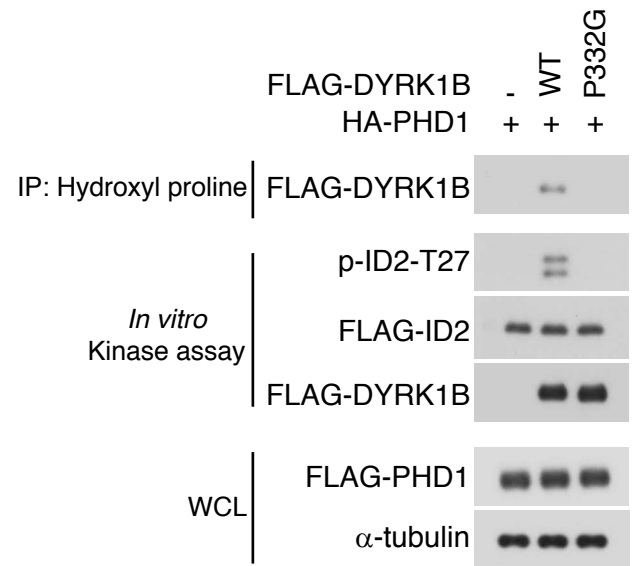

**C**

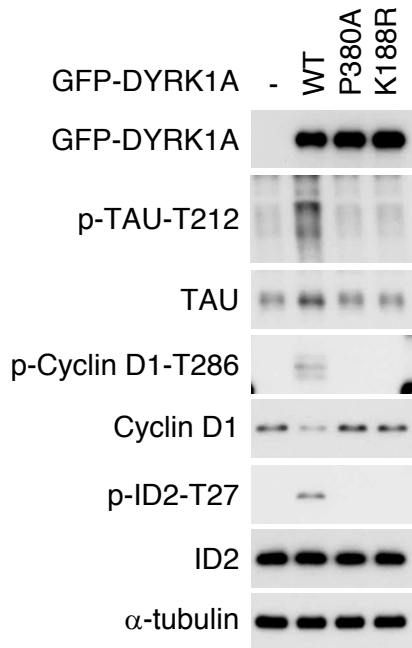

**D**

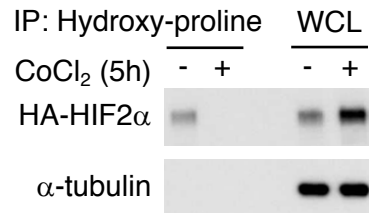

**E**

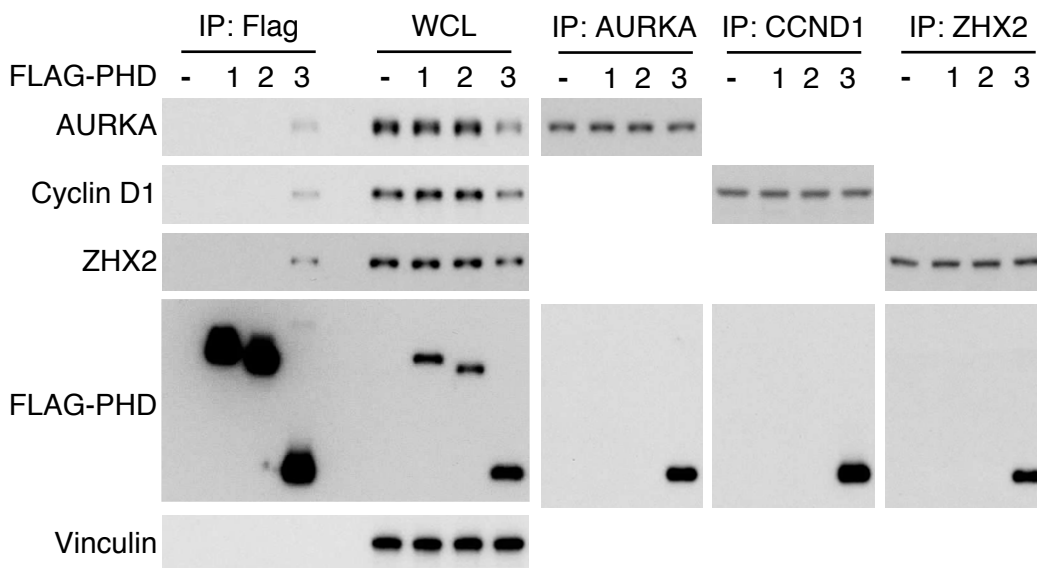

**F**

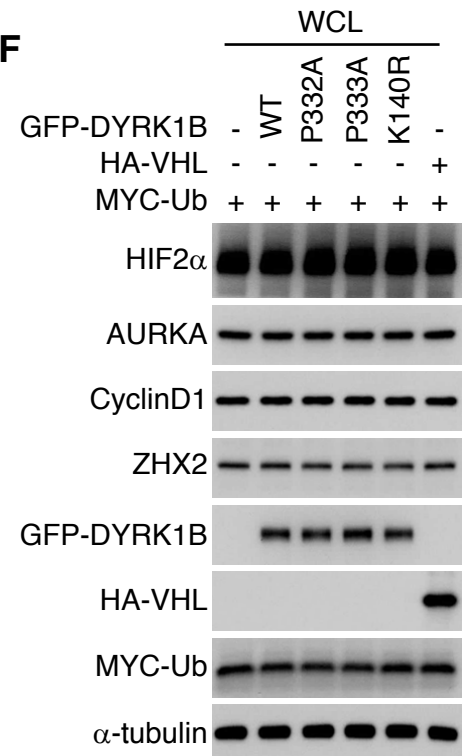

**Figure S3 (Related to Figure 4) Stoichiometry, functional analysis of hydroxylated P332 of DYRK1B and analysis of VHL substrates.** (A) Hydroxyl-proline immunoprecipitation of HA-DYRK1B or HA-HIF2 $\alpha$  expressed in 293T cells (500  $\mu$ g of cellular lysates; 100% or 50% of DYRK1B or HIF2 $\alpha$  reactions, respectively) and serial dilutions of total extract ( $\mu$ g: total  $\mu$ g of lysates) were processed by western blot using HA antibodies and analyzed by densitometry. Indicated is the fraction of hydroxylated proline in DYRK1B and HIF2 $\alpha$  in the presence of FLAG-PHD1. (B) FLAG-DYRK1B proteins immunoprecipitated from U87 cells transfected with plasmids coding for DYRK1B wild type and the mutant P332G were used for hydroxyl-proline immunoprecipitation followed by western blot for FLAG. DYRK1B wild type and DYRK1B-P332G were immunopurified from the same lysates and used in kinase assay *in vitro* towards recombinant ID2. (C) GFP-DYRK1A wild type or mutants P380A and K188R were transfected into U87. Cellular lysates were analyzed for total levels and phosphorylation of endogenous DYRK1 kinase substrates as described in Figure 1G. (D) Western blot analysis of HIF2 $\alpha$  from cells treated with vehicle or CoCl<sub>2</sub>. HIF2 $\alpha$  protein was used for GST-VHL pull-down experiment in Figure 4A. (E) Interaction between AURKA, cyclin D1, ZHX2 with PHD3. U87 cells were transfected with plasmids expressing FLAG-PHD1, FLAG-PHD2, FLAG-PHD3 or the empty vector. Cellular lysates were immunoprecipitated using FLAG antibody followed by western blot for the indicated endogenous proteins (left panels). Reciprocal immunoprecipitations were also performed to test interaction of endogenous VHL substrates with FLAG-PHD proteins (right panels). (F) Western blot analysis of whole cellular lysates used in the ubiquitylation assay in Figure 4E. WCL, whole cellular lysate.

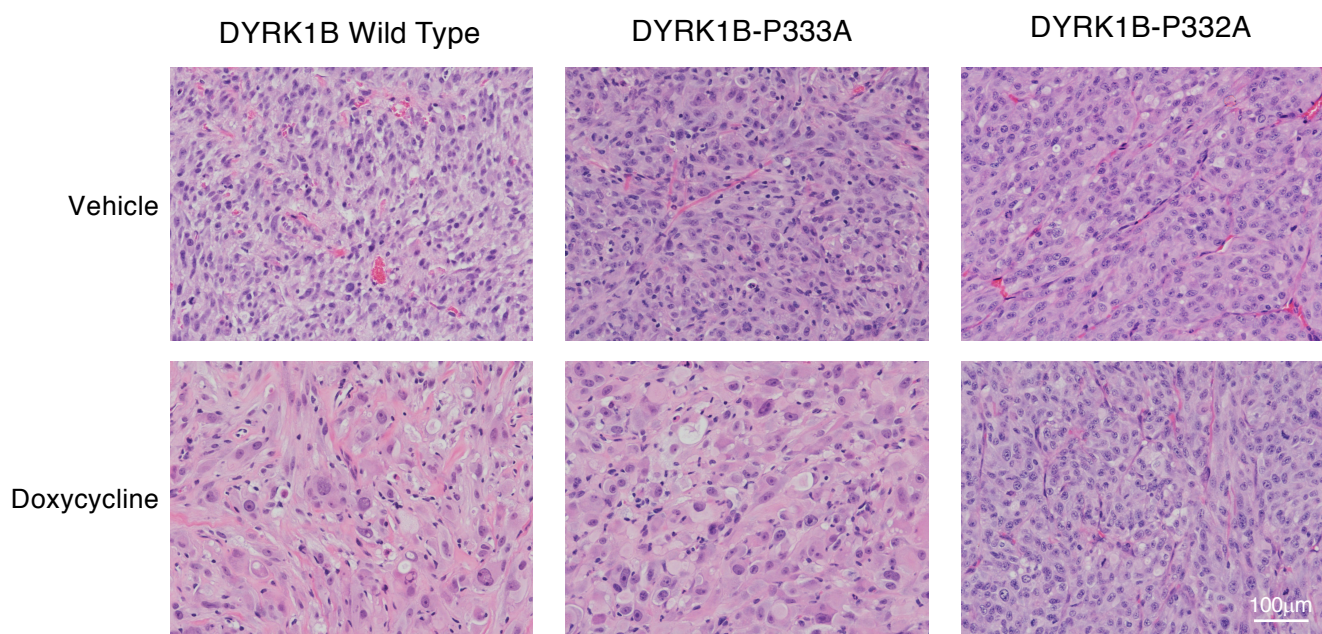

**Figure S4 (Related to Figure 5) Histological analysis of DYRK1B expressing glioblastoma xenografts.** Hematoxylin and Eosin staining shows enlarged tumor cells after doxycycline-induced expression of DYRK1B wild type and DYRK1B-P333A but not DYRK1B-P332A. Scale bar: 100  $\mu$ M.



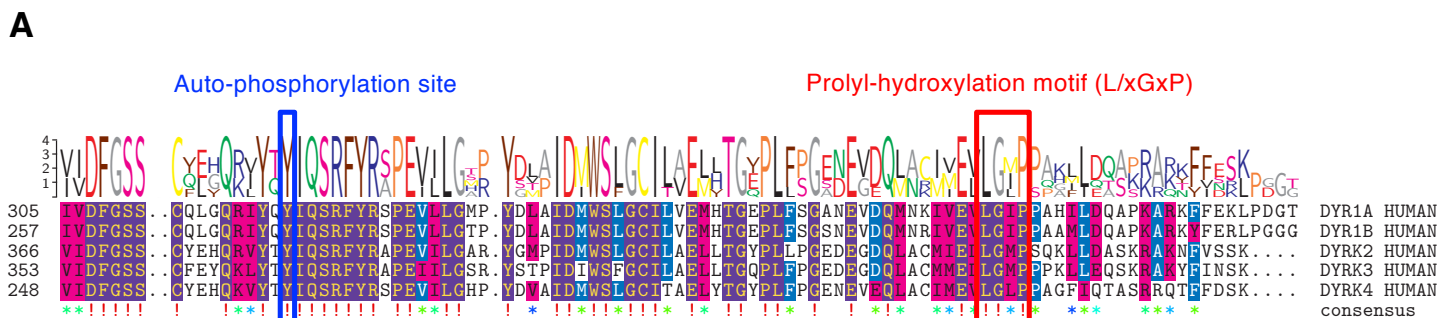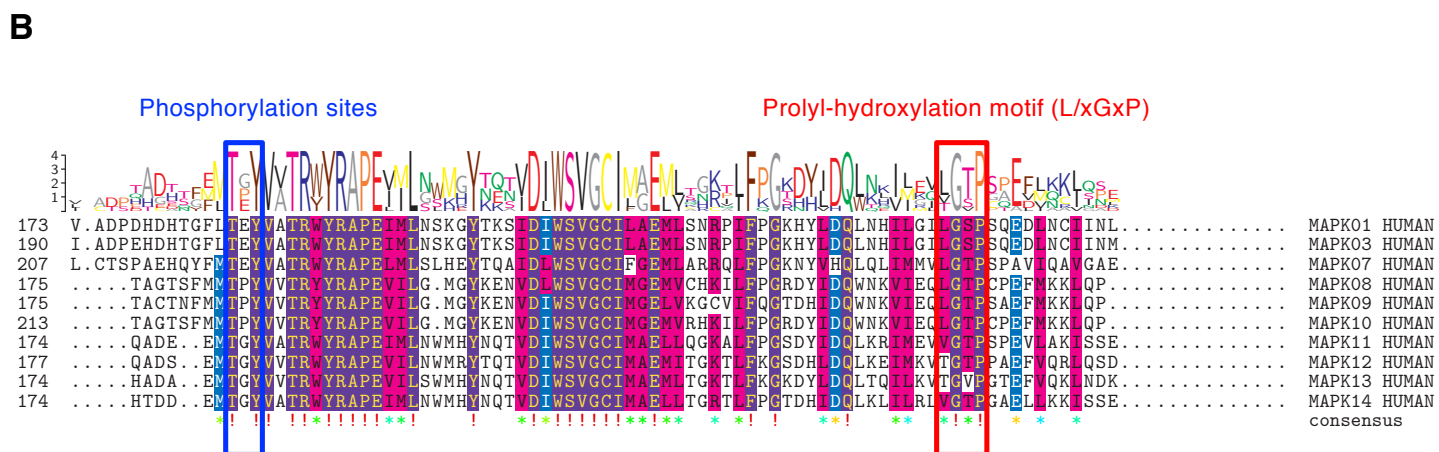

**Figure S5 (Related to Figure 6 and Table S1, S2) A prolyl hydroxylation motif is present in DYRK and MAPK kinase family members.** (A) The prolyl hydroxylation motif (L/xGxP) is conserved across DYRK family members. (B) The prolyl hydroxylation motif (L/xGxP) is conserved across MAPK family members. Prolyl hydroxylation motif and auto-phosphorylation sites are boxed in red and blue, respectively.

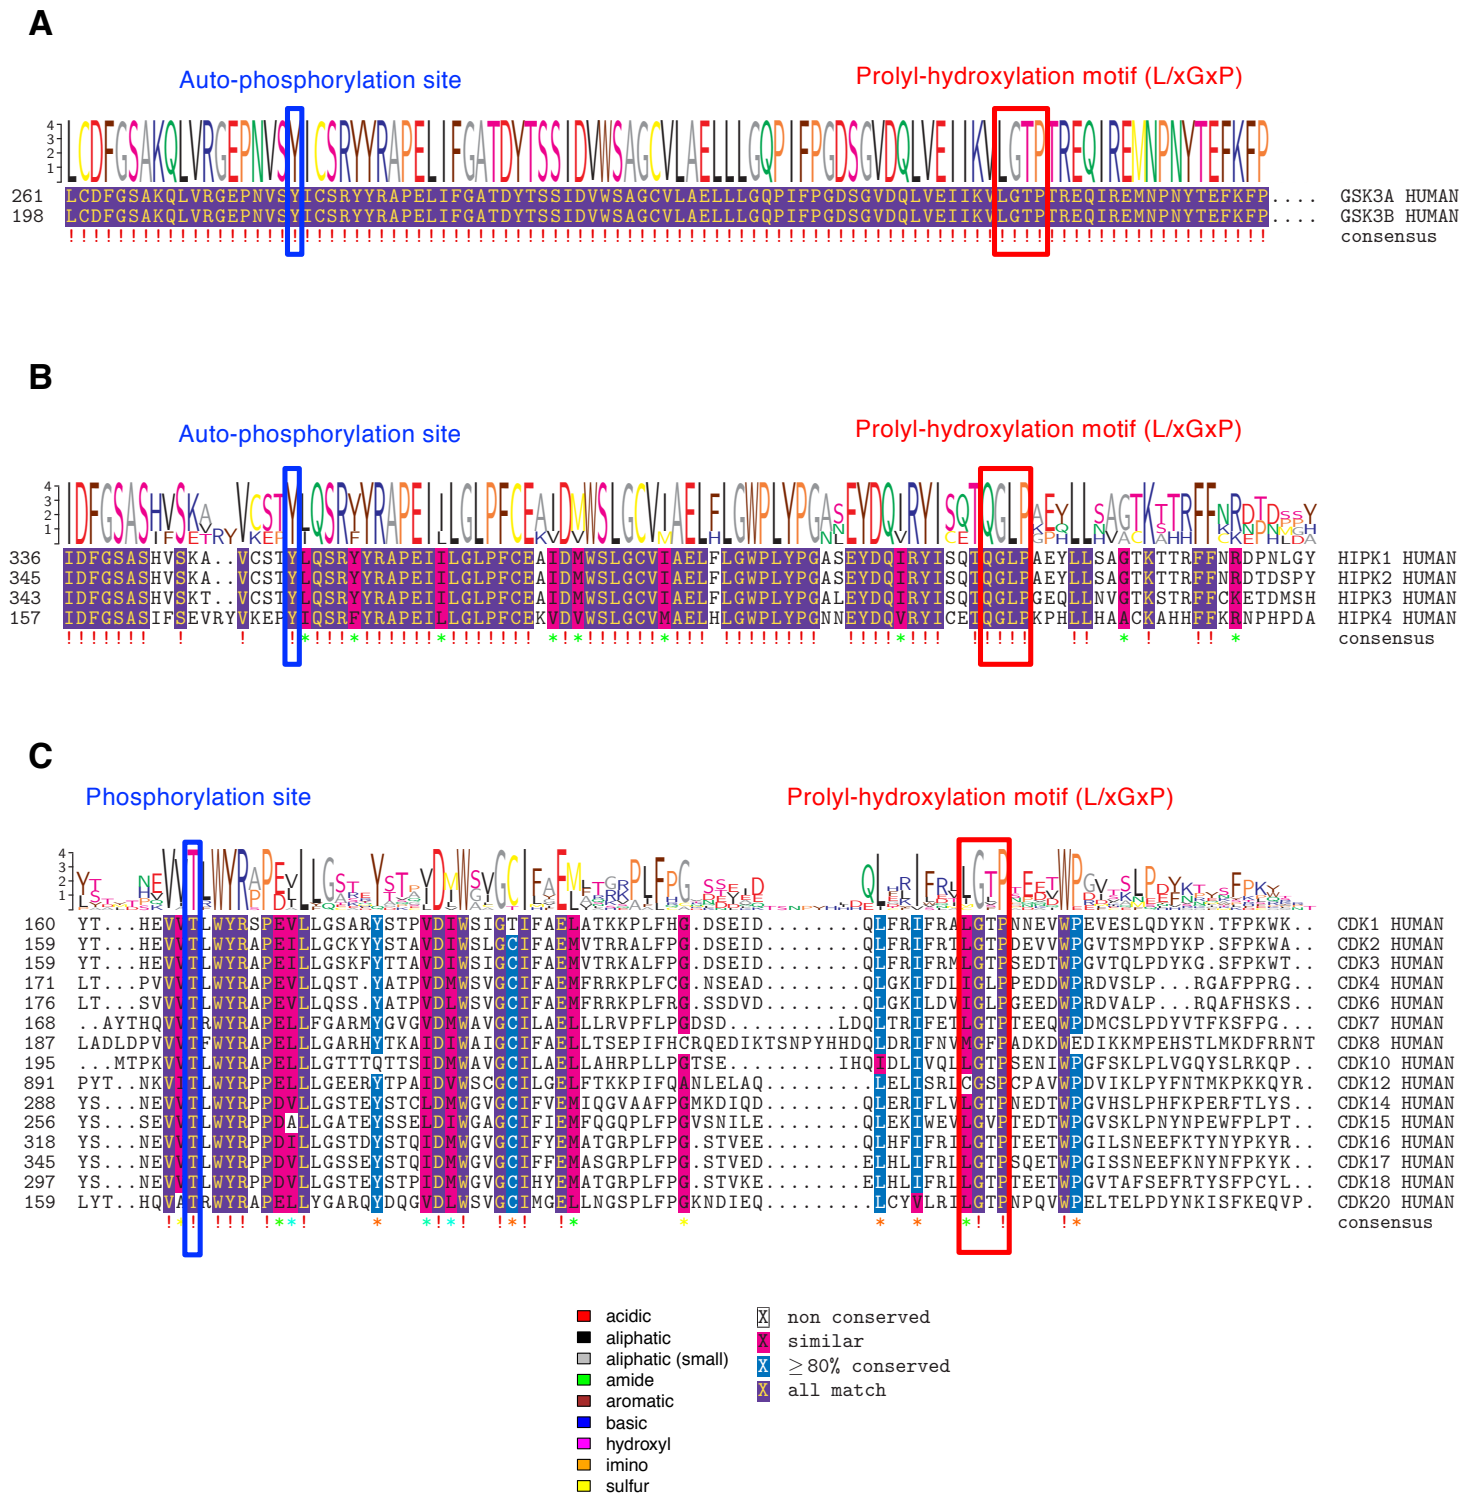

**Figure S6 (Related to Figure 7 and Tables S3) A prolyl hydroxylation motif is present in GSK, HIPK and CDK kinases.** (A) The prolyl hydroxylation motif (L/xGxP) is conserved across GSK3 family members. (B) The prolyl hydroxylation motif (L/xGxP) is conserved across HIPK family members. (C) The prolyl hydroxylation motif (L/xGxP) is conserved across CDK family members. Prolyl hydroxylation motif and auto-phosphorylation sites are boxed in red and blue, respectively.

Figure S7

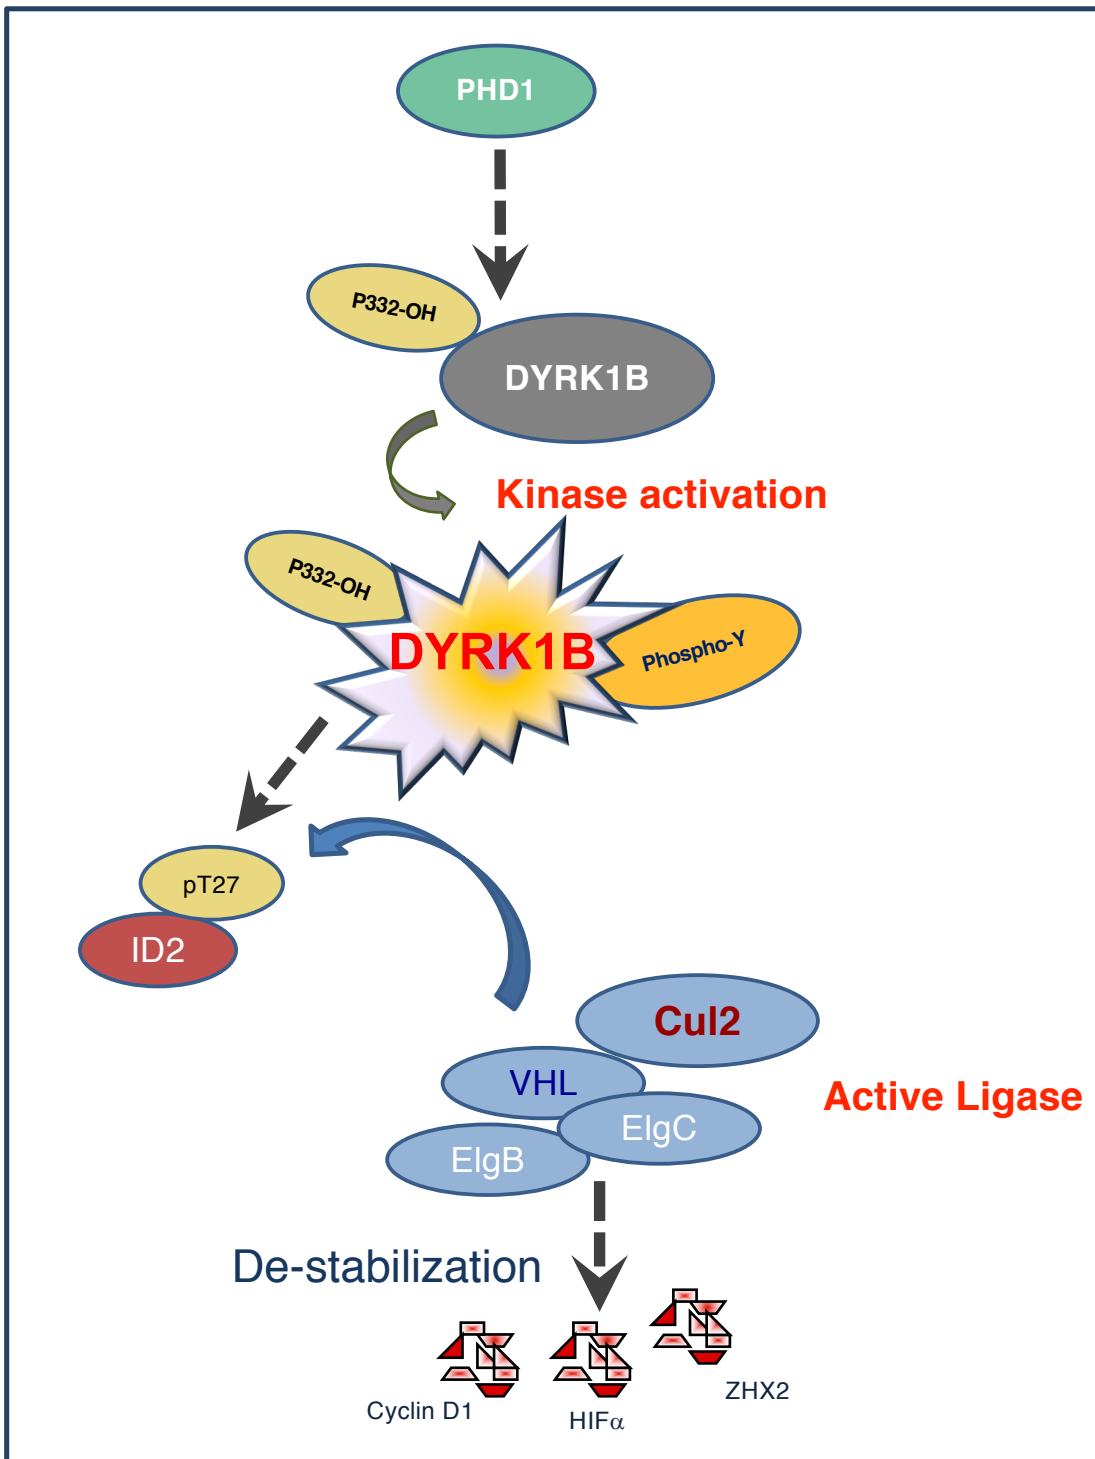

**Figure S7 (Related to Figure 4) PHD-dependent activation of DYRK1 kinases sustains tumor suppression by VCB<sup>CRL</sup>.** In cellular contexts that favour prolyl hydroxylase activity, PHD1 functions on newly synthesized DYRK1 kinases causing hydroxylation of proline 332 of DYRK1B (shown) and proline 380 of DYRK1A. This event is required for tyrosine phosphorylation and full activation of DYRK1. The activity of DYRK1 kinases on threonine 27 of ID2 imposes a functional constraint on ID2 ability to interact with the VHL-Elongin C-Elongin B (VCB complex) and inactivate the ubiquitin ligase activity of VCB<sup>CRL</sup> by displacing CUL2 from the complex. With functional PHDs and DYRK1 kinases, the VCB<sup>CRL</sup> ubiquitin ligase complex remains competent to efficiently ubiquitylate its substrates (HIF- $\alpha$ , Cyclin D1, ZHX2).

**Table S1.** (Related to Figure 1, 7 and Figure S2, 5) List of prolyl hydroxylation motifs, sites of autophosphorylation in the activation loop and relative distance are reported for DYRK family members.

| Protein | Threonine / Tyrosine phosphorylation |             | Proline hydroxylation |                | Distance |
|---------|--------------------------------------|-------------|-----------------------|----------------|----------|
|         | Position                             | Motif (YxY) | Position              | Motif (L/xGxP) |          |
| DYRK1A  | 319-321                              | YQY         | 377-380               | LGIP           | 59       |
| DYRK1B  | 271-273                              | YQY         | 329-332               | LGIP           | 59       |
| DYRK2   | 380-382                              | YTY         | 438-441               | LGMP           | 59       |
| DYRK3   | 367-369                              | YTY         | 425-428               | LGMP           | 59       |
| DYRK4   | 262-264                              | YTY         | 320-323               | LGLP           | 59       |

**Table S2.** (Related to Figure 6 and Figure S5). List of prolyl hydroxylation motifs, sites of autophosphorylation in the activation loop and relative distance are reported for MAPK family members.

| Protein | Threonine / Tyrosine Phosphorylation |             | Proline hydroxylation |                | Distance |
|---------|--------------------------------------|-------------|-----------------------|----------------|----------|
|         | Position                             | Motif (TxY) | Position              | Motif (L/xGxP) |          |
| MAPK01  | 185-187                              | TEY         | 244-247               | LGSP           | 60       |
| MAPK03  | 202-204                              | TEY         | 261-264               | LGSP           | 60       |
| MAPK07  | 219-221                              | TEY         | 278-281               | LGTP           | 60       |
| MAPK08  | 183-185                              | TPY         | 241-244               | LGTP           | 59       |
| MAPK09  | 183-185                              | TPY         | 241-244               | LGTP           | 59       |
| MAPK10  | 221-223                              | TPY         | 279-282               | LGTP           | 59       |
| MAPK11  | 180-182                              | TGY         | 239-242               | VGTP           | 60       |
| MAPK12  | 183-185                              | TGY         | 242-245               | TGTP           | 60       |
| MAPK13  | 180-182                              | TGY         | 239-242               | TGVP           | 60       |
| MAPK14  | 180-182                              | TGY         | 239-242               | VGTP           | 60       |



**Table S3.** (Related to Figure 7 and Figure S6). List of prolyl hydroxylation motifs, sites of autophosphorylation in the activation loop and relative distance are reported for GSK3 and HIPK family members.

| Protein | Threonine / Tyrosine Phosphorylation |             | Proline hydroxylation |                | Distance |
|---------|--------------------------------------|-------------|-----------------------|----------------|----------|
|         | Position                             | Motif (xxY) | Position              | Motif (L/xGxP) |          |
| GSK3A   | 277-279                              | VSY         | 336-339               | LGTP           | 60       |
| GSK3B   | 214-216                              | VSY         | 273-276               | LGTP           | 60       |
|         |                                      |             |                       |                |          |
| HIPK1   | 350-352                              | STY         | 408-411               | QGLP           | 59       |
| HIPK2   | 359-361                              | STY         | 417-420               | QGLP           | 59       |
| HIPK3   | 357-359                              | STY         | 415-418               | QGLP           | 59       |
| HIPK4   | 173-175                              | EPY         | 231-234               | QGLP           | 59       |

**Table S4.** (Related to Figure 7 and Figure S6). List of prolyl hydroxylation motifs, sites of autophosphorylation in the activation loop and relative distance are reported for CDK family members.

| Protein | Threonine phosphorylation |             | Proline hydroxylation |                | Distance |
|---------|---------------------------|-------------|-----------------------|----------------|----------|
|         | Position                  | Motif (VxT) | Position              | Motif (L/xGxP) |          |
| CDK1    | 164-166                   | VVT         | 220-223               | LGTP           | 57       |
| CDK2    | 163-165                   | VVT         | 219-222               | LGTP           | 57       |
| CDK3    | 163-165                   | VVT         | 219-222               | LGTP           | 57       |
| CDK4    | 175-177                   | VVT         | 230-233               | IGLP           | 56       |
| CDK6    | 180-182                   | VVT         | 235-238               | IGLP           | 56       |
| CDK7    | 173-175                   | VVT         | 229-232               | LGTP           | 57       |
| CDK8    | 194-196                   | VVT         | 259-262               | MGFP           | 66       |
| CDK10   | 199-201                   | VVT         | 255-258               | LGTP           | 57       |
| CDK12   | 896-898                   | VIT         | 952-955               | CGSP           | 57       |
| CDK14   | 292-294                   | VVT         | 349-352               | LGTP           | 58       |
| CDK15   | 260-262                   | VVT         | 317-320               | LGVP           | 58       |
| CDK16   | 322-324                   | VVT         | 378-381               | LGTP           | 57       |
| CDK17   | 349-351                   | VVT         | 405-408               | LGTP           | 57       |
| CDK18   | 301-303                   | VVT         | 357-360               | LGTP           | 57       |
| CDK20   | 164-166                   | VAT         | 220-223               | LGTP           | 57       |
